# Supplementary material for: The anti-inflammatory effect ofAgaricus brasiliensisis partly due to its linoleic acid content
Source: Royal Society of Chemistry journal article supplement (doi:10.1039/c7fo01172e), 2017-01-01
Supplement: c7fo01172e4.pdf [file c7fo01172e4.pdf]

### Supplement data

Fig. 1S. Fractions from fractionated 90% methanol fraction by HPLC

Fig. 2S. The one-dimensional  $^1\text{H}$  and  $^{13}\text{C}$  and two-dimensional COSY spectra of linoleic acid from (A, B and C respectively).
