# Supplementary figures and images for: The anti-inflammatory effect ofAgaricus brasiliensisis partly due to its linoleic acid content
Source: Royal Society of Chemistry journal article supplement (doi:10.1039/c7fo01172e), 2017-01-01

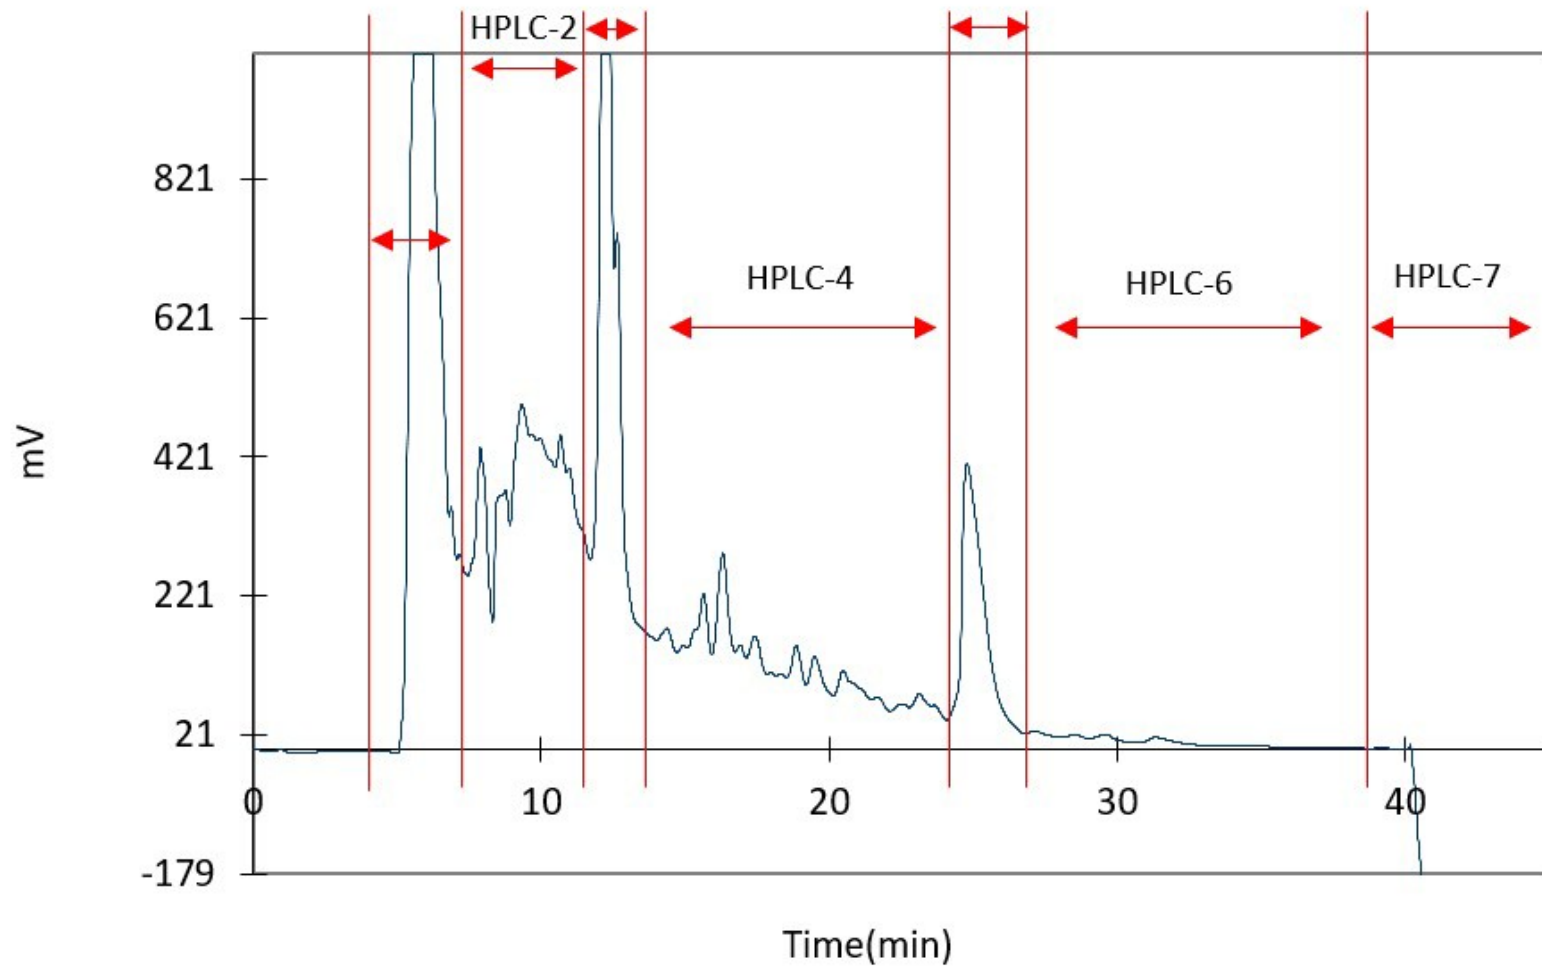

Supplement: c7fo01172e2.pdf [file c7fo01172e2.pdf]

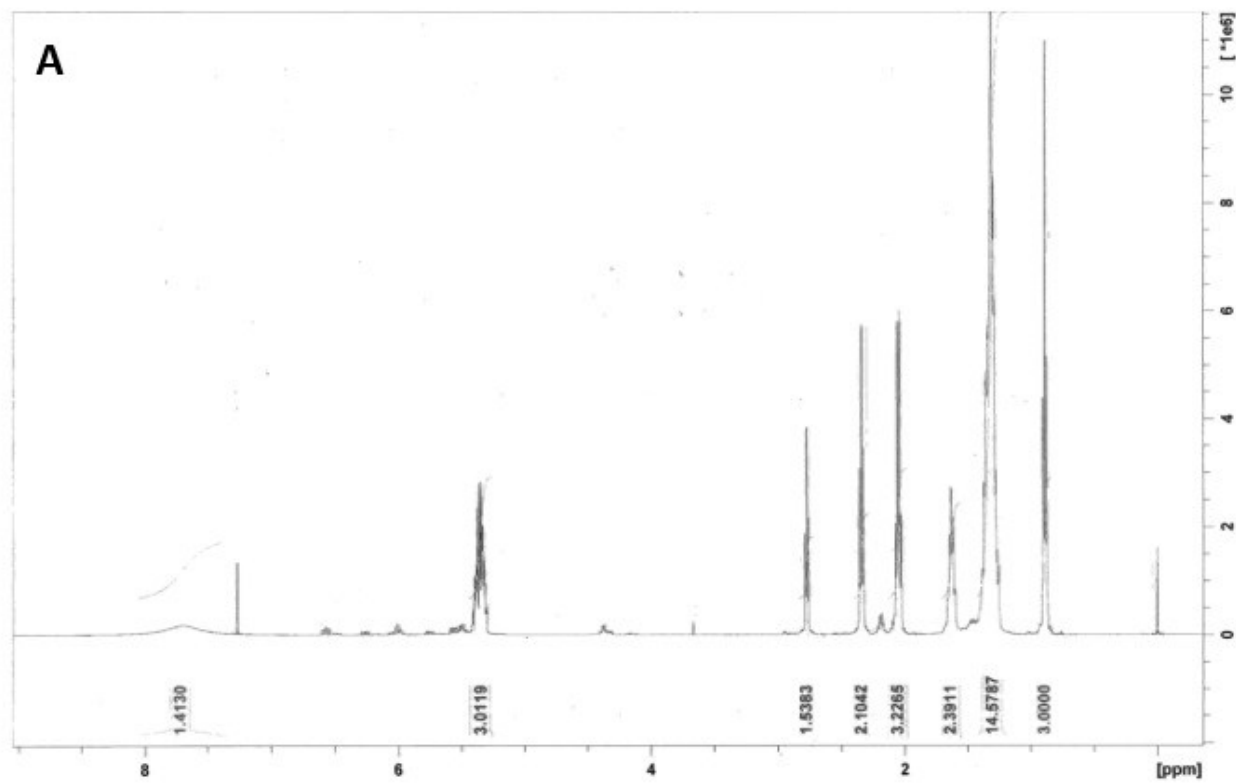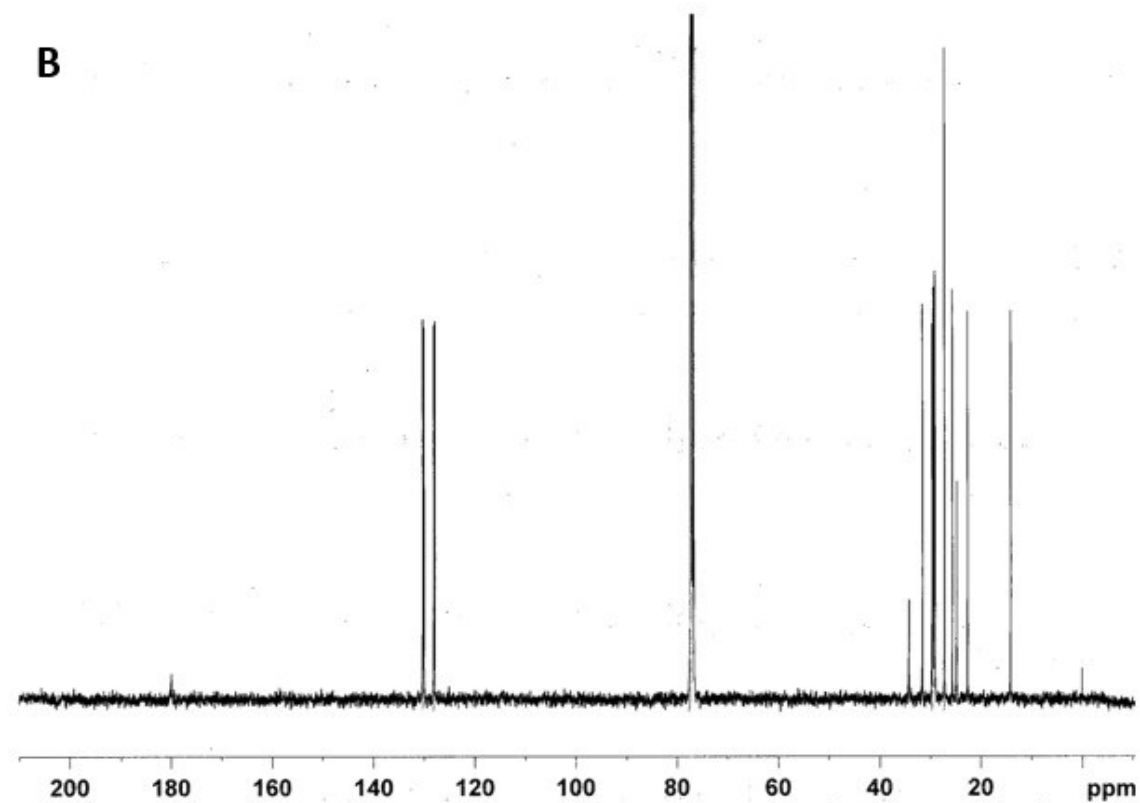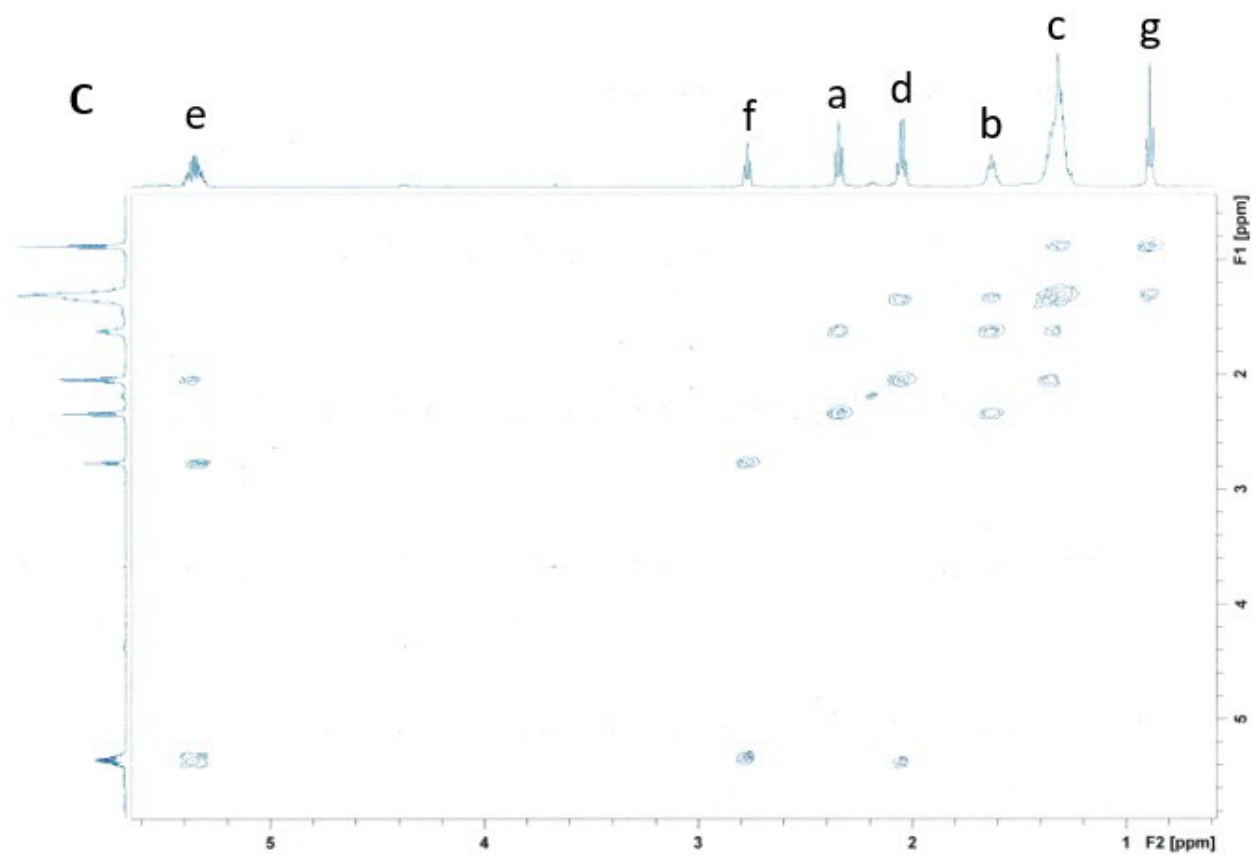

Linoleic acid structure

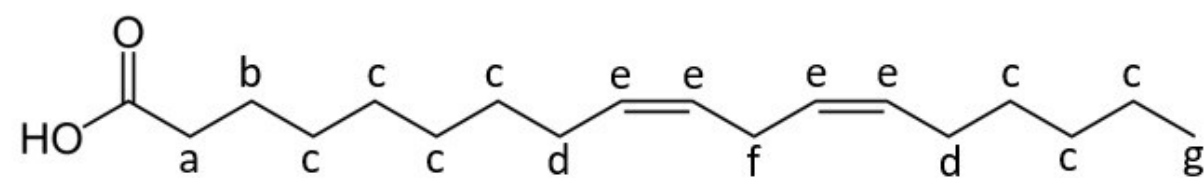

Supplement: c7fo01172e3.pdf [file c7fo01172e3.pdf]
